# Supplementary material for: Third-generation sequencing revises the molecular karyotype for Toxoplasma gondii and identifies emerging copy number variants in sexual recombinants
Source: HighWire-hosted journal article supplement (doi:10.1101/gr.262816.120), 2021-04-27
Supplement: SupplementalTableS7.xlsx [file SupplementalTableS7.xlsx]

## Sheet: Table_S7
						T. gondii copy number by strain			N. caninum			T. gondii	T. gondii copy number by strain (Nanopore)			N. caninum copy number (Nanopore)
Locus Name	Chrom	Position (MB)	ToxoDB Gene Name	Signal peptide?	Annotation	I	II	III	Chrom	Position (mb)	Copy #	Updated gene name or ToxoDB-48_ME49 position	I	II	III	Contig	Position (mb)	Copy #
EL1	Ia	1.41	TGME49_095110	YES	rhoptry protein ROP7 (ROP7)	5	5	7	Ia	1.79	3	TGME49_295110	3,1*	5,1*	6,1*	NcLIV_tig00000607	2.04	0,6*
EL2	Ib	1.55	TGME49_009920	YES	PAN domain-containing protein	4	6	7	Ib	1.48	1	TGME49_209920	1	1	1	NcLIV_tig00000006	0.15	1
EL3	Ib	1.61	TGME49_009980	YES	cAMP-dependent protein kinase (ROP42 family)	13	13	13	Ib	1.54	1	TGME49_209985	9	8	7	NcLIV_tig00000101	0.47	4
EL4	II	0.07	TGME49_020950	YES	hypothetical protein	9	5	5	II	0.13	2	TGME49_220950	3,4*	3,4*	2,3*	NcLIV_tig00000071	2.08	2*
EL5	II	1.46	TGME49_023150	NO	START domain-containing protein	5	2	3	II	1.45	1	TGME49_223150	5	2	2	NcLIV_tig00000071	0.76	2*
EL6	III	0.36	TGME49_052060	YES	KRUF family protein	4	4	4	No hits	No hits	0	TGME49_252065	1,3*	1,4*	1,2*	N/A	N/A	N/A
EL7	III	0.61	TGME49_052630	NO	hypothetical protein	3	3	3	No hits	No Hits	0	TGME49_252630	1	1	1	NcLIV_tig00007786	1.67	1*
EL8	III	0.81	TGME49_053180	YES	hypothetical protein	1	2	2	III	0.68	1	TGME49_253180	2	3	4	N/A	N/A	N/A
EL9	IV	1.04	TGME49_119090	YES	IgA-specific serine endopeptidase	15	15	15	IV	1.02	12	TGME49_319090	2	2	2	NcLIV_tig00000064	1.1	1*
EL10	IV	1.51	TGME49_118130	NO	Toxoplasma gondii family E protein	1	3	3	IV	1.48	1	TGME49_318130	2	4	3	N/A	N/A	N/A
EL11	IV	2.14	no genes	NA	NA	5	5	5	IV	2.18	1	EL11 TGME49_chrIV:2160087-2164086	1	1	1	N/A	N/A	N/A
EL12	IV	2.48	TGME49_012410	YES	dense granule protein GRA11	1	1	2	IV	2.05	1	TGME49_212410	1,2*	1,2*	1,1*	N/A	N/A	N/A
EL13	VI	0.26	TGME49_038520	YES	SAG-related sequence SRS22G (SRS22G)	0	6	11	VI	0.25	1	TGME49_238520	5	6	6	N/A	N/A	N/A
EL14	VI	1.16	TGME49_040310	YES	Toxoplasma gondii family E protein	8	4	8	VI	0.99	5	TGME49_240310	1,7*	1,6*	1,6*	N/A	N/A	N/A
EL15	VI	1.68	TGME49_041190	YES	hypothetical protein	11	11	11	VI	1.47	2	TGME49_241240	4,1*	4,1*	4,1*	N/A	N/A	N/A
EL16	VI	1.88	TGME49_042110	YES	rhoptry kinase family protein ROP38 (ROP38)	2	3	8	VI	1.65	18	TGME49_242110	2	3	6	NcLIV_tig00000033	2.43	4
EL17	VI	2.37	TGME49_043130	YES	Toxoplasma gondii family A protein	4	2	2	VI	2.14	5	TGME49_243130	1,1*	1,1*	1,2*	NcLIV_tig00000033	2.93	3*
EL18	VIIa	1.06	no genes	NA	NA	5	5	5	No hits	No hits	0	EL18 TGME49_chrVIIa:1089723-1122336	2	2	2	N/A
EL19	VIIa	1.67	TGME49_004560	NO	type I fatty acid synthase, putative	3	5	4	VIIa	1.21	5	TGME49_204560	1	1	1	NcLIV_tig00000049	1.65	1
EL20	VIIa	4.01	TGME49_081360	YES	hypothetical protein	2	2	2	VIIa	3.52	2	TGME49_281360	1.5*	1.5*	1.5*	NcLIV_tig00007786	2.58	1,5*
EL21	VIIb	1.31	no genes	NA	NA	3	3	3	VIIb	1.26	1	EL21 TGME49_chrVIIb:1316315-1320314	1	1	1	N/A	N/A	N/A
EL22	VIIb	2.79	TGME49_059410	YES	SAG-related sequence SRS26A (SRS26A)	1	2	1	VIIb	2.67	1	TGME49_259410	1,2*	1,2*	1,2*	N/A	N/A	N/A
EL23	VIII	6.74	TGME49_000240	YES	microneme protein MIC17B (MIC17B)	3	2	3	VIII	6.49	2	TGME49_200240	6	8	8	NcLIV_tig00000001	0.3	4
EL24	IX	0.05	no genes	NA	NA	30	20	10	No hits	No hits	0	EL24 TGME49_chrXII:7006612-7018630	2,5*	4,4*	4,4*	N/A
EL25	IX	1.3	TGME49_066350	YES	hypothetical protein	6	4	6	No hits	No hits	0	TGME49_266340	7,1*	3,1*	8,1*	NcLIV_tig00000006	1.06	3
EL26	IX	1.57	TGME49_065660	YES	hypothetical protein	2	2	2	IX	1.05	1	TGME49_265650	2	2	2	NcLIV_tig00000006	1.32	1
EL27	IX	2.34	TGME49_087950	NO	hypothetical protein	60	60	40	IX	1.78	5	TGME49_264420	1	1	1	N/A
EL28	X	0.05	TGME49_028790	YES	hypothetical protein	12	18	18	X	2.83	1	EL28: ND	43	35	38	N/A
EL29	X	2.93	TGME49_024540	NO	hypothetical protein	15	10	24	X	2.83	1	TGME49_224540	1	1	1	NcLIV_tig00000006	4.8	1*
EL30	X	3.86	TGME49_023250	YES	hypothetical protein	9	6	4	X	3.69	1	TGME49_212310	1,6*	1,7*	1,2*	NcLIV_tig00000006	3.91	1*										3.72	9*	full gene once, truncated sequence repeated multiple times
EL31	X	4.03	TGME49_011920	NO	hypothetical protein	15	18	8	X	3.88	3	TGME49_212030	1,10*	1,11*	1,9*	NcLIV_tig00000006	3.72	9*
EL32	X	4.11	TGME49_011840	NO	hypothetical protein	10	14	9	X	3.93	5	TGME49_234165	6*	8*	9*	NcLIV_tig00000006	3.66	9*
EL33	X	4.93	TGME49_035630	YES	hypothetical protein	4	3	4	No hits	No hits	0	TGME49_235630	2.1*	1,1*	2,1*	N/A	N/A	N/A
EL34	X	5.32	TGME49_036290	YES	hypothetical protein	2	3	4	No hits	No hits	0	TGME49_236290	1,1*	1,1*	1,1*	N/A	N/A	N/A
EL35	X	5.67	TGME49_037130	YES	cytochrome b, putative	100	40	100	No hits	No hits	0	TGME49_237130	multiple hits	multiple hits	multiple hits	mutiple hits
EL36	X	7.09	TGME49_015770	YES	rhoptry protein ROP8 (ROP8)	6	6	6	No hits	No hits	0	TGME49_215775	3	6	8	N/A	N/A	N/A
EL37	X	7.27	TGME49_007010	YES	SAG-related sequence SRS48K (SRS48K)	5	5	5	X	6.75	2	TGME49_207010	5,7*	5,6*	5,7*	N/A	N/A	N/A
EL38	XI	0.04	no genes	NA	NA	40	15	15	No hits	No hits	0	EL38 TGME49_chrXI:39161-51819	1*	1,1*	1,1*	N/A	N/A	N/A
EL39	XI	0.06	no genes	NA	NA	2	2	2	No hits	No hits	0	EL39 TGME49_chrXI:55009-60494	1,1*	1,1*	1,1*	N/A	N/A	N/A
EL40	XI	0.22	EST gi:47128181	NA	NA	5	5	5	No hits	No hits	0	EL40: ND	ND	ND	ND	N/A	N/A	N/A
EL41	XI	0.23	no genes	NA	NA	5	10	13	No hits	No hits	0	EL41 TGME49_chrXI:223918-231865	1,1*	1,1*	1,1*	N/A	N/A	N/A
EL42	XI	4.19	TGME49_114660	YES	TPRX1 protein	2	2	2	No hits	No hits	0	TGME49_314660	2	2	2	N/A	N/A	N/A
EL43	XI	5.6	no genes	NA	NA	20	25	35	No hits	No hits	0	EL43 TGME49_chrXI:5590935-5636472	1,14*	1,14*	1,14*	N/A	N/A	N/A
EL44	XI	5.62	TGME49_017230	NO	hypothetical protein	55	55	60	No hits	No hits	0	TGME49_316780	2	2	2	N/A	N/A	N/A
EL45	XI	6.57	TGME49_098560	YES	hypothetical protein	4	6	7	XI	6.08	8	TGME49_215885	6	6	6	NcLIV_tig00007783	0.2	6
EL46	XII	0.34	no genes	NA	NA	50	125	50	No hits	No hits	0	EL46 TGME49_chrXII:361654-375010	1,8*	1,8*	1,8*	N/A	N/A	N/A
EL47	XII	0.54	TGME49_108080	YES	rhoptry protein ROP5	3	14	4	XII	0.35	2	TGME49_308090	7,2*	9,1*	4,3*	NcLIV_tig00000014	0.57	2
EL48	XII	2.22	TGME49_000010	YES	hypothetical protein	2	2	0	XII	1.96	1	TGME49_200010	1,3*	1,3*	1,1*	N/A	N/A	N/A
EL49	XII	5.01	no genes	NA	NA	2	2	2	XII	5.2	1	EL49 TGME49_chrXII:5026966-5030965	1	1	1	N/A	N/A	N/A
EL50	XII	5.31	TGME49_051060	NO	hypothetical protein	7	5	7	No hits	No hits	0	TGME49_323010	3	3	3	N/A	N/A	N/A
EL51	XII	5.67	TGME49_051960	YES	SAG-related sequence SRS59K (SRS59K)	3	3	7	XII	5.32	1	TGME49_251958	3,2*	5,2*	6,2*	N/A	N/A	N/A
EL52	XII	6.66	TGME49_077270	YES	NTPase II	3	3	4	XII	6.24	1	TGME49_277270	2	2	2	NcLIV_tig00000014	6.39	2*
EL53	XII	6.68	TGME49_077240	YES	NTPase I	2	2	2	XII	6.29	1	TGME49_277240	3*	3*	3*	NcLIV_tig00000014	6.39	3*

## Sheet: README
Column Name	Column Name	Description
	Locus Name	"EL" stands for "Expanded Locus". Numbers taken from Adomako-Ankomah et al. 2018; PMID 24496792
	Chrom	Chromsome
	Position (MB)	Position on Chromosome
	ToxoDB Gene Name	Gene name (if available) from v7 of ToxoDB
	Signal peptide?	Whether a signal peptide is predicted near the N-terminus (data from ToxoDB.org)
	Annotation	Other relevant information (manual annotations or from other sources).
T. gondii copy number by strain	I	Copy number estimated by sequence read coverage using v7 assembly: Type I strain GT-1
	II	Copy number estimated by sequence read coverage using v7 assembly: Type II strain ME49
	III	Copy number estimated by sequence read coverage using v7 assembly: Type III strain VEG
N. caninum	Chrom	Predicted N. caninum chromosome of syntenic locus (based on ToxoDB.org)
	Position (MB)	Position on Chromosome
	Copy #	Estimated copy number based on read coverage
T. gondii	Updated gene name or ToxoDB-48_ME49 position	Most up to date gene names or chromosome positions taken from ToxoDB.org
T. gondii copy number by strain (Nanopore)	I	Copy number estimated by sequence read coverage using Nanopore assembly: Type I strain GT-1
	II	Copy number estimated by sequence read coverage using Nanopore assembly: Type II strain ME49
	III	Copy number estimated by sequence read coverage using Nanopore assembly: Type III strain VEG
N. caninum copy number (Nanopore)	Contig	Nanopore assembly contig harboring the gene
	Position (MB)	Position on Nanopore assembly contig
	Copy #	Copy number estimated by sequence read coverage using Nanopore assembly
