# Supplementary material for: Third-generation sequencing revises the molecular karyotype for Toxoplasma gondii and identifies emerging copy number variants in sexual recombinants
Source: HighWire-hosted journal article supplement (doi:10.1101/gr.262816.120), 2021-04-27
Supplement: SupplementalTableS8.xlsx [file SupplementalTableS8.xlsx]

## Sheet: Table_S8
				Nanopore Assembly Range			Copy number
Repeat Name	Period	Chrom	Chrom Position (ME49)	TgRH88	TgME49	TgCTG	TgRH88	TgME49	TgCTG
TgME49_tig00000028_ChrIa_1878662_1898469	1355	ChrIa	1878662	TgRH88_tig00000106_ChrIa:1864523..1880141	TgME49_tig00000028_ChrIa:1878662..1898338	TgCTG_tig00000034_ChrIa:1882051..1900375	22	28	26
TgME49_tig00000028_ChrIa_1878662_1898469	679	ChrIa	1878662	TgRH88_tig00000106_ChrIa:1864523..1880141	TgME49_tig00000028_ChrIa:1878662..1898338	TgCTG_tig00000034_ChrIa:1882051..1900375	23	29	27
TgME49_tig00000028_ChrIa_1918097_1921737	1103	ChrIa	1918097	TgRH88_tig00000106_ChrIa:1899892..1904215	TgME49_tig00000028_ChrIa:1918097..1968884	ND	3	4	0
TgME49_tig00000028_ChrIa_1948649_1950094	717	ChrIa	1948649	TgRH88_tig00000106_ChrIa:1883713..1888914	TgME49_tig00000028_ChrIa:1901910..1956830	ND	3	17	0
TgME49_tig00000028_ChrIa_1955395_1956844	719	ChrIa	1955395	TgRH88_tig00000106_ChrIa:1883713..1888914	TgME49_tig00000028_ChrIa:1901910..1956830	ND	3	17	0
TgME49_tig00000028_ChrIa_1976380_1983613	1717	ChrIa	1976380	ND	TgME49_tig00000028_ChrIa:1928904..1983252	ND	0	5	0
TgME49_tig00000032_ChrIb_8826_13713	1574	ChrIb	8826	TgRH88_tig00000006_ChrIb:2024623..2027771	TgME49_tig00000032_ChrIb:8826..11975	TgCTG_tig00000018_ChrIb:1965329..1968481	2	2	2
TgME49_tig00000032_ChrIb_15255_19371	1694	ChrIb	15255	TgRH88_tig00000006_ChrIb:2017961..2021349	TgME49_tig00000032_ChrIb:15255..18645	TgCTG_tig00000018_ChrIb:1958657..1962051	2	2	2
TgME49_tig00000032_ChrIb_432665_435383	1085	ChrIb	432665	TgRH88_tig00000006_ChrIb:1594899..1597062	TgME49_tig00000032_ChrIb:432665..435378	TgCTG_tig00000018_ChrIb:1544203..1546909	3	4	4
TgME49_tig00000032_ChrIb_432665_435383	543	ChrIb	432665	TgRH88_tig00000006_ChrIb:1594899..1597062	TgME49_tig00000032_ChrIb:432665..435378	TgCTG_tig00000018_ChrIb:1544203..1546909	4	5	5
TgME49_tig00000032_ChrIb_553464_556108	573	ChrIb	553464	TgRH88_tig00000006_ChrIb:1476485..1478347	TgME49_tig00000032_ChrIb:553464..556035	TgCTG_tig00000018_ChrIb:1423439..1425450	10	15	11
TgME49_tig00000022_ChrII_6493_18992	1035	ChrII	6493	ND	TgME49_tig00000022_ChrII:9593..91553	ND	0	20	0
TgME49_tig00000022_ChrII_16952_21477	1187	ChrII	16952	ND	TgME49_tig00000022_ChrII:19353..20537	ND	0	1	0
TgME49_tig00000022_ChrII_20296_33727	1368	ChrII	20296	ND	TgME49_tig00000022_ChrII:20296..90477	ND	0	10	0
TgME49_tig00000022_ChrII_35379_48048	1352	ChrII	35379	ND	TgME49_tig00000022_ChrII:35379..47565	ND	0	17	0
TgME49_tig00000022_ChrII_35379_48048	677	ChrII	35379	ND	TgME49_tig00000022_ChrII:35379..47565	ND	0	18	0
TgME49_tig00000022_ChrII_91546_95264	675	ChrII	91546	ND	TgME49_tig00000022_ChrII:91546..94922	ND	0	5	0
TgME49_tig00000022_ChrII_91559_95264	1349	ChrII	91559	ND	TgME49_tig00000022_ChrII:91559..94932	ND	0	4	0
TgME49_tig00000022_ChrII_105127_108471	1673	ChrII	105127	ND	TgME49_tig00000022_ChrII:105127..108470	TgCTG_tig00000001_ChrII:144890..148221	0	2	2
TgME49_tig00000022_ChrII_682391_685200	718	ChrII	682391	TgRH88_tig00000031_ChrII:700273..703423	TgME49_tig00000022_ChrII:682391..685200	TgCTG_tig00000001_ChrII:713700..716515	15	13	13
TgME49_tig00000025_ChrIII_6294_13403	1687	ChrIII	6294	TgRH88_tig00000013_ChrIII:2571776..2581909	TgME49_tig00000025_ChrIII:6294..13027	TgCTG_tig00000014_ChrIII:2575462..2582206	6	4	4
TgME49_tig00000025_ChrIII_22143_32836	1682	ChrIII	22143	TgRH88_tig00000013_ChrIII:2552558..2562660	TgME49_tig00000025_ChrIII:22143..32235	TgCTG_tig00000014_ChrIII:2556230..2566342	6	6	6
TgME49_tig00000025_ChrIII_39440_51456	1906	ChrIII	39440	TgRH88_tig00000013_ChrIII:2535894..2545399	TgME49_tig00000025_ChrIII:39440..50839	TgCTG_tig00000014_ChrIII:2537600..2549014	5	6	6
TgME49_tig00000025_ChrIII_56419_83911	724	ChrIII	56419	TgRH88_tig00000013_ChrIII:2498504..2530312	TgME49_tig00000025_ChrIII:56419..83889	TgCTG_tig00000014_ChrIII:2504525..2532019	44	38	38
TgME49_tig00000025_ChrIII_157332_160753	1732	ChrIII	157332	TgRH88_tig00000013_ChrIII:2418142..2421547	TgME49_tig00000025_ChrIII:157332..160753	TgCTG_tig00000014_ChrIII:2427643..2431066	2	2	2
TgME49_tig00000025_ChrIII_171741_174932	1212	ChrIII	171741	TgRH88_tig00000013_ChrIII:2404747..2407165	TgME49_tig00000025_ChrIII:171741..174161	TgCTG_tig00000014_ChrIII:2414233..2416653	2	2	2
TgME49_tig00000025_ChrIII_181246_187682	1183	ChrIII	181246	TgRH88_tig00000013_ChrIII:2392267..2398132	TgME49_tig00000025_ChrIII:181246..187139	TgCTG_tig00000014_ChrIII:2401242..2407148	5	5	5
TgME49_tig00000025_ChrIII_221061_223531	832	ChrIII	221061	TgRH88_tig00000013_ChrIII:2353560..2358354	TgME49_tig00000025_ChrIII:221061..223531	TgCTG_tig00000014_ChrIII:2362522..2367317	4	3	4
TgME49_tig00000025_ChrIII_234097_240844	1857	ChrIII	234097	TgRH88_tig00000013_ChrIII:2332694..2343900	TgME49_tig00000025_ChrIII:234097..239662	TgCTG_tig00000014_ChrIII:2347298..2352864	6	3	3
TgME49_tig00000025_ChrIII_244215_245879	632	ChrIII	244215	TgRH88_tig00000013_ChrIII:2326284..2328135	TgME49_tig00000025_ChrIII:244215..247424	TgCTG_tig00000014_ChrIII:2339541..2342743	3	5	5
TgME49_tig00000025_ChrIII_244609_247565	1289	ChrIII	244609	TgRH88_tig00000013_ChrIII:2326501..2327742	TgME49_tig00000025_ChrIII:244614..247192	TgCTG_tig00000014_ChrIII:2339773..2342344	1	3	3
TgME49_tig00000025_ChrIII_245241_246542	663	ChrIII	245241	TgRH88_tig00000013_ChrIII:2326501..2327747	TgME49_tig00000025_ChrIII:244609..247192	TgCTG_tig00000014_ChrIII:2339773..2342349	2	4	4
TgME49_tig00000025_ChrIII_245904_247168	626	ChrIII	245904	TgRH88_tig00000013_ChrIII:2326517..2327747	TgME49_tig00000025_ChrIII:244609..247155	TgCTG_tig00000014_ChrIII:2339810..2342349	2	4	4
TgME49_tig00000025_ChrIII_311912_314901	910	ChrIII	311912	TgRH88_tig00000013_ChrIII:2259997..2261813	TgME49_tig00000025_ChrIII:311912..313729	TgCTG_tig00000014_ChrIII:2273233..2275050	2	2	2
TgME49_tig00000025_ChrIII_2582222_2585728	1064	ChrIII	2582222	TgRH88_tig00000013_ChrIII:9067..17302	TgME49_tig00000025_ChrIII:2578235..2585407	TgCTG_tig00000014_ChrIII:9002..20177	5	4	5
TgME49_tig00000020_ChrIV_31965_37391	1868	ChrIV	31965	TgRH88_tig00000014_ChrIV:32711..38129	TgME49_tig00000020_ChrIV:31965..37391	TgCTG_tig00000019_ChrIV:2809035..2814453	3	3	3
TgME49_tig00000020_ChrIV_37894_43055	1730	ChrIV	37894	TgRH88_tig00000014_ChrIV:38632..43792	TgME49_tig00000020_ChrIV:37894..43055	TgCTG_tig00000019_ChrIV:2803375..2808532	3	3	3
TgME49_tig00000020_ChrIV_52476_56748	1907	ChrIV	52476	TgRH88_tig00000014_ChrIV:53212..57028	TgME49_tig00000020_ChrIV:52476..56291	TgCTG_tig00000019_ChrIV:2790137..2793954	2	2	2
TgME49_tig00000020_ChrIV_60381_66078	1325	ChrIV	60381	TgRH88_tig00000014_ChrIV:61780..66411	TgME49_tig00000020_ChrIV:61043..65675	TgCTG_tig00000019_ChrIV:2780094..2785388	6	6	7
TgME49_tig00000020_ChrIV_60381_66078	1986	ChrIV	60381	TgRH88_tig00000014_ChrIV:61118..66411	TgME49_tig00000020_ChrIV:60381..65675	TgCTG_tig00000019_ChrIV:2780094..2786041	6	6	7
TgME49_tig00000020_ChrIV_60381_66078	661	ChrIV	60381	TgRH88_tig00000014_ChrIV:61780..66411	TgME49_tig00000020_ChrIV:61043..65675	TgCTG_tig00000019_ChrIV:2780094..2785388	7	7	8
TgME49_tig00000020_ChrIV_67550_68632	511	ChrIV	67550	TgRH88_tig00000014_ChrIV:68286..69307	TgME49_tig00000020_ChrIV:67550..68571	TgCTG_tig00000019_ChrIV:2777201..2778222	2	2	2
TgME49_tig00000020_ChrIV_496974_542149	508	ChrIV	496974	TgRH88_tig00000014_ChrIV:494611..563893	TgME49_tig00000020_ChrIV:496974..602192	TgCTG_tig00000019_ChrIV:2226770..2359048	87	154	197
TgME49_tig00000020_ChrIV_541278_543140	919	ChrIV	541278	TgRH88_tig00000014_ChrIV:494680..563824	TgME49_tig00000020_ChrIV:497043..602123	TgCTG_tig00000019_ChrIV:2226839..2358979	86	152	194
TgME49_tig00000020_ChrIV_542196_558191	507	ChrIV	542196	TgRH88_tig00000014_ChrIV:494680..563824	TgME49_tig00000020_ChrIV:497043..602123	TgCTG_tig00000019_ChrIV:2226839..2358979	87	153	197
TgME49_tig00000020_ChrIV_584335_602192	1017	ChrIV	584335	TgRH88_tig00000014_ChrIV:494658..563846	TgME49_tig00000020_ChrIV:497021..602145	TgCTG_tig00000019_ChrIV:2226817..2359001	85	152	194
TgME49_tig00000020_ChrIV_584335_602192	508	ChrIV	584335	TgRH88_tig00000014_ChrIV:494658..563846	TgME49_tig00000020_ChrIV:497021..602145	TgCTG_tig00000019_ChrIV:2226817..2359001	87	154	197
TgME49_tig00000020_ChrIV_584335_602192	516	ChrIV	584335	TgRH88_tig00000014_ChrIV:494658..563846	TgME49_tig00000020_ChrIV:497021..602145	TgCTG_tig00000019_ChrIV:2226817..2359001	87	154	197
TgME49_tig00000020_ChrIV_2277397_2280963	838	ChrIV	2277397	TgRH88_tig00000014_ChrIV:2208294..2210808	TgME49_tig00000020_ChrIV:2277397..2280749	TgCTG_tig00000019_ChrIV:553060..556414	3	4	4
TgME49_tig00000020_ChrIV_2729032_2737224	1625	ChrIV	2729032	TgRH88_tig00000014_ChrIV:2656920..2661799	TgME49_tig00000020_ChrIV:2729032..2733907	TgCTG_tig00000019_ChrIV:96872..100133	3	3	2
TgME49_tig00000020_ChrIV_2733110_2737224	1681	ChrIV	2733110	TgRH88_tig00000014_ChrIV:2661000..2664373	TgME49_tig00000020_ChrIV:2733110..2736474	TgCTG_tig00000019_ChrIV:94296..97672	2	2	2
TgME49_tig00000020_ChrIV_2738267_2739375	538	ChrIV	2738267	TgRH88_tig00000014_ChrIV:2666163..2667235	TgME49_tig00000020_ChrIV:2738267..2739340	TgCTG_tig00000019_ChrIV:91430..92505	2	2	2
TgME49_tig00000020_ChrIV_2765467_2768401	1417	ChrIV	2765467	TgRH88_tig00000014_ChrIV:2694965..2724893	TgME49_tig00000020_ChrIV:2765467..2773341	TgCTG_tig00000019_ChrIV:38569..62959	5	3	8
TgME49_tig00000020_ChrIV_2765775_2766982	603	ChrIV	2765775	TgRH88_tig00000014_ChrIV:2695273..2743850	TgME49_tig00000020_ChrIV:2765775..2795785	TgCTG_tig00000019_ChrIV:31548..62649	54	30	19
TgME49_tig00000020_ChrIV_2767195_2772022	1207	ChrIV	2767195	TgRH88_tig00000014_ChrIV:2695275..2731624	TgME49_tig00000020_ChrIV:2765777..2780079	TgCTG_tig00000019_ChrIV:38471..52901	39	20	4
TgME49_tig00000020_ChrIV_2767195_2772022	1811	ChrIV	2767195	TgRH88_tig00000014_ChrIV:2696694..2731624	TgME49_tig00000020_ChrIV:2767195..2780079	ND	34	17	0
TgME49_tig00000020_ChrIV_2767195_2772022	605	ChrIV	2767195	TgRH88_tig00000014_ChrIV:2695275..2743852	TgME49_tig00000020_ChrIV:2765777..2795787	TgCTG_tig00000019_ChrIV:33805..62046	60	33	14
TgME49_tig00000020_ChrIV_2772233_2780079	1207	ChrIV	2772233	TgRH88_tig00000014_ChrIV:2695273..2731624	TgME49_tig00000020_ChrIV:2765775..2780079	TgCTG_tig00000019_ChrIV:38471..55956	39	20	4
TgME49_tig00000020_ChrIV_2772233_2780079	1809	ChrIV	2772233	TgRH88_tig00000014_ChrIV:2696694..2731624	TgME49_tig00000020_ChrIV:2767195..2780079	ND	34	17	0
TgME49_tig00000020_ChrIV_2779475_2791484	1629	ChrIV	2779475	TgRH88_tig00000014_ChrIV:2708959..2743247	TgME49_tig00000020_ChrIV:2779475..2790884	TgCTG_tig00000019_ChrIV:33594..59210	24	13	21
TgME49_tig00000020_ChrIV_2779475_2791484	814	ChrIV	2779475	TgRH88_tig00000014_ChrIV:2695880..2743247	TgME49_tig00000020_ChrIV:2766380..2795186	TgCTG_tig00000019_ChrIV:31337..62046	29	17	23
TgME49_tig00000020_ChrIV_2791485_2814631	1442	ChrIV	2791485	TgRH88_tig00000014_ChrIV:2743851..2766670	TgME49_tig00000020_ChrIV:2791485..2814480	TgCTG_tig00000019_ChrIV:17095..33594	15	15	11
TgME49_tig00000020_ChrIV_2821275_2824697	673	ChrIV	2821275	TgRH88_tig00000014_ChrIV:2773465..2778182	TgME49_tig00000020_ChrIV:2821275..2824641	TgCTG_tig00000019_ChrIV:6927..10300	7	5	5
TgME49_tig00000016_ChrV_7204_12688	1696	ChrV	7204	TgRH88_tig00000029_ChrV:3469034..3475506	TgME49_tig00000016_ChrV:7204..12276	TgCTG_tig00000015_ChrV:8014..14738	3	3	4
TgME49_tig00000016_ChrV_14619_32567	694	ChrV	14619	TgRH88_tig00000029_ChrV:3438252..3465249	TgME49_tig00000016_ChrV:15999..31913	TgCTG_tig00000015_ChrV:17005..37085	36	21	27
TgME49_tig00000016_ChrV_14619_38525	1388	ChrV	14619	TgRH88_tig00000029_ChrV:3438252..3465249	TgME49_tig00000016_ChrV:15999..31913	TgCTG_tig00000015_ChrV:17005..35008	34	19	25
TgME49_tig00000016_ChrV_34415_38496	1386	ChrV	34415	TgRH88_tig00000029_ChrV:3429366..3434642	TgME49_tig00000016_ChrV:35801..42420	TgCTG_tig00000015_ChrV:40698..50052	2	3	5
TgME49_tig00000016_ChrV_34415_38496	693	ChrV	34415	TgRH88_tig00000029_ChrV:3430034..3465454	TgME49_tig00000016_ChrV:16486..41793	TgCTG_tig00000015_ChrV:16802..49423	31	21	28
TgME49_tig00000016_ChrV_38689_42449	686	ChrV	38689	TgRH88_tig00000029_ChrV:3424416..3433134	TgME49_tig00000016_ChrV:38689..48088	TgCTG_tig00000015_ChrV:46329..55038	9	11	10
TgME49_tig00000016_ChrV_42612_48894	686	ChrV	42612	TgRH88_tig00000029_ChrV:3424414..3433134	TgME49_tig00000016_ChrV:38689..48090	TgCTG_tig00000015_ChrV:46329..55040	9	11	10
TgME49_tig00000016_ChrV_63072_64600	537	ChrV	63072	TgRH88_tig00000029_ChrV:3408108..3409434	TgME49_tig00000016_ChrV:63072..64414	TgCTG_tig00000015_ChrV:70026..71379	4	4	4
TgME49_tig00000016_ChrV_3271254_3278997	1485	ChrV	3271254	TgRH88_tig00000029_ChrV:273688..285626	TgME49_tig00000016_ChrV:3271254..3283060	TgCTG_tig00000015_ChrV:3180669..3192625	7	5	7
TgME49_tig00000016_ChrV_3277575_3283316	1484	ChrV	3277575	TgRH88_tig00000029_ChrV:273432..285298	TgME49_tig00000016_ChrV:3271582..3283316	TgCTG_tig00000015_ChrV:3180997..3192881	6	7	6
TgME49_tig00000016_ChrV_3280420_3284390	1484	ChrV	3280420	TgRH88_tig00000029_ChrV:273360..285298	TgME49_tig00000016_ChrV:3271582..3283388	TgCTG_tig00000015_ChrV:3180997..3192953	6	6	6
TgME49_tig00000016_ChrV_3291565_3296556	1730	ChrV	3291565	TgRH88_tig00000029_ChrV:258260..268462	TgME49_tig00000016_ChrV:3291565..3295025	TgCTG_tig00000015_ChrV:3201133..3206335	4	2	3
TgME49_tig00000016_ChrV_3298978_3315382	1677	ChrV	3298978	TgRH88_tig00000029_ChrV:237665..254309	TgME49_tig00000016_ChrV:3298978..3312300	TgCTG_tig00000015_ChrV:3210287..3216907	10	8	4
TgME49_tig00000016_ChrV_3341929_3354086	1507	ChrV	3341929	TgRH88_tig00000029_ChrV:194426..208031	TgME49_tig00000016_ChrV:3341929..3356983	TgCTG_tig00000015_ChrV:3246566..3261642	8	8	8
TgME49_tig00000016_ChrV_3370438_3376906	1335	ChrV	3370438	TgRH88_tig00000029_ChrV:169051..174410	TgME49_tig00000016_ChrV:3370438..3377130	TgCTG_tig00000015_ChrV:3284815..3287508	4	5	2
TgME49_tig00000016_ChrV_3376283_3397291	1708	ChrV	3376283	TgRH88_tig00000029_ChrV:166502..168209	TgME49_tig00000016_ChrV:3377968..3379675	TgCTG_tig00000015_ChrV:3288347..3290027	1	1	1
TgME49_tig00000016_ChrV_3419327_3422086	1150	ChrV	3419327	TgRH88_tig00000029_ChrV:124776..127108	TgME49_tig00000016_ChrV:3419327..3421644	TgCTG_tig00000015_ChrV:3326088..3328391	2	2	2
TgME49_tig00000016_ChrV_3422485_3426082	1125	ChrV	3422485	TgRH88_tig00000029_ChrV:120572..128918	TgME49_tig00000016_ChrV:3417240..3425851	TgCTG_tig00000015_ChrV:3324250..3332606	4	4	4
TgME49_tig00000016_ChrV_3427266_3447958	1734	ChrV	3427266	TgRH88_tig00000029_ChrV:100180..119148	TgME49_tig00000016_ChrV:3427266..3447958	TgCTG_tig00000015_ChrV:3334030..3353013	6	7	6
TgME49_tig00000016_ChrV_3452162_3454142	866	ChrV	3452162	TgRH88_tig00000029_ChrV:57636..95996	TgME49_tig00000016_ChrV:3452162..3553436	TgCTG_tig00000015_ChrV:3357196..3389383	11	22	8
TgME49_tig00000016_ChrV_3452765_3457086	1472	ChrV	3452765	TgRH88_tig00000029_ChrV:57394..94791	TgME49_tig00000016_ChrV:3452765..3553678	TgCTG_tig00000015_ChrV:3357798..3389627	10	21	7
TgME49_tig00000016_ChrV_3455706_3460052	869	ChrV	3455706	TgRH88_tig00000029_ChrV:28431..94791	TgME49_tig00000016_ChrV:3452765..3571533	TgCTG_tig00000015_ChrV:3357798..3409710	38	35	17
TgME49_tig00000016_ChrV_3463258_3464458	599	ChrV	3463258	TgRH88_tig00000029_ChrV:19444..92542	TgME49_tig00000016_ChrV:3460034..3575866	TgCTG_tig00000015_ChrV:3359180..3411198	58	91	42
TgME49_tig00000016_ChrV_3464819_3466534	603	ChrV	3464819	TgRH88_tig00000029_ChrV:19352..95394	TgME49_tig00000016_ChrV:3453636..3575958	TgCTG_tig00000015_ChrV:3358668..3411290	15	30	13
TgME49_tig00000016_ChrV_3466874_3468072	603	ChrV	3466874	TgRH88_tig00000029_ChrV:28791..92537	TgME49_tig00000016_ChrV:3460034..3574928	TgCTG_tig00000015_ChrV:3359185..3406535	39	66	23
TgME49_tig00000016_ChrV_3468432_3470141	603	ChrV	3468432	TgRH88_tig00000029_ChrV:19352..95394	TgME49_tig00000016_ChrV:3453636..3575958	TgCTG_tig00000015_ChrV:3358668..3411290	15	30	13
TgME49_tig00000016_ChrV_3471079_3473923	941	ChrV	3471079	TgRH88_tig00000029_ChrV:20046..94883	TgME49_tig00000016_ChrV:3452765..3575264	TgCTG_tig00000015_ChrV:3357798..3409688	54	91	41
TgME49_tig00000016_ChrV_3473051_3474787	864	ChrV	3473051	TgRH88_tig00000029_ChrV:55496..94792	TgME49_tig00000016_ChrV:3452765..3553168	TgCTG_tig00000015_ChrV:3357798..3395622	20	31	15
TgME49_tig00000016_ChrV_3473921_3477866	1537	ChrV	3473921	TgRH88_tig00000029_ChrV:19352..92451	TgME49_tig00000016_ChrV:3459181..3575958	TgCTG_tig00000015_ChrV:3359271..3410259	40	68	29
TgME49_tig00000016_ChrV_3476306_3477504	600	ChrV	3476306	TgRH88_tig00000029_ChrV:19443..92542	TgME49_tig00000016_ChrV:3454143..3575867	TgCTG_tig00000015_ChrV:3359180..3411199	57	96	43
TgME49_tig00000016_ChrV_3478729_3481113	937	ChrV	3478729	TgRH88_tig00000029_ChrV:19955..92451	TgME49_tig00000016_ChrV:3460721..3575355	TgCTG_tig00000015_ChrV:3359271..3410687	38	63	29
TgME49_tig00000016_ChrV_3481114_3486399	1875	ChrV	3481114	TgRH88_tig00000029_ChrV:26578..92542	TgME49_tig00000016_ChrV:3471080..3575265	TgCTG_tig00000015_ChrV:3359180..3410597	33	55	23
TgME49_tig00000016_ChrV_3481114_3486399	938	ChrV	3481114	TgRH88_tig00000029_ChrV:20045..92542	TgME49_tig00000016_ChrV:3460630..3575265	TgCTG_tig00000015_ChrV:3359180..3410597	47	71	32
TgME49_tig00000016_ChrV_3487673_3491658	1690	ChrV	3487673	TgRH88_tig00000029_ChrV:8247..79067	TgME49_tig00000016_ChrV:3461242..3588669	TgCTG_tig00000015_ChrV:3363141..3422407	11	13	8
TgME49_tig00000016_ChrV_3495575_3497288	599	ChrV	3495575	TgRH88_tig00000029_ChrV:19352..95394	TgME49_tig00000016_ChrV:3453636..3575958	TgCTG_tig00000015_ChrV:3358668..3411290	15	30	13
TgME49_tig00000016_ChrV_3498158_3501932	938	ChrV	3498158	TgRH88_tig00000029_ChrV:20046..94882	TgME49_tig00000016_ChrV:3452765..3575264	TgCTG_tig00000015_ChrV:3357798..3409688	54	87	39
TgME49_tig00000016_ChrV_3502772_3503963	601	ChrV	3502772	TgRH88_tig00000029_ChrV:19438..94877	TgME49_tig00000016_ChrV:3454148..3575872	TgCTG_tig00000015_ChrV:3361932..3411204	53	77	36
TgME49_tig00000016_ChrV_3505989_3507192	602	ChrV	3505989	TgRH88_tig00000029_ChrV:19443..92542	TgME49_tig00000016_ChrV:3454143..3575867	TgCTG_tig00000015_ChrV:3359180..3411199	59	92	44
TgME49_tig00000016_ChrV_3506682_3509293	869	ChrV	3506682	TgRH88_tig00000029_ChrV:20024..94791	TgME49_tig00000016_ChrV:3452765..3575286	TgCTG_tig00000015_ChrV:3357798..3409710	54	82	38
TgME49_tig00000016_ChrV_3509872_3531101	1875	ChrV	3509872	TgRH88_tig00000029_ChrV:26578..92542	TgME49_tig00000016_ChrV:3471080..3575265	TgCTG_tig00000015_ChrV:3359180..3410597	33	52	23
TgME49_tig00000016_ChrV_3509872_3531101	938	ChrV	3509872	TgRH88_tig00000029_ChrV:20045..92542	TgME49_tig00000016_ChrV:3460630..3575265	TgCTG_tig00000015_ChrV:3359180..3410597	47	67	32
TgME49_tig00000016_ChrV_3532378_3536364	1690	ChrV	3532378	TgRH88_tig00000029_ChrV:8247..79067	TgME49_tig00000016_ChrV:3461242..3588669	TgCTG_tig00000015_ChrV:3363141..3422407	11	13	8
TgME49_tig00000016_ChrV_3540285_3542004	603	ChrV	3540285	TgRH88_tig00000029_ChrV:19352..95394	TgME49_tig00000016_ChrV:3453636..3575958	TgCTG_tig00000015_ChrV:3358668..3411290	15	30	13
TgME49_tig00000016_ChrV_3540889_3543836	1472	ChrV	3540889	TgRH88_tig00000029_ChrV:55496..95394	TgME49_tig00000016_ChrV:3453632..3555579	TgCTG_tig00000015_ChrV:3362016..3389114	6	19	8
TgME49_tig00000016_ChrV_3542874_3546658	941	ChrV	3542874	TgRH88_tig00000029_ChrV:20046..94882	TgME49_tig00000016_ChrV:3452765..3575264	TgCTG_tig00000015_ChrV:3357798..3409688	52	85	40
TgME49_tig00000016_ChrV_3550738_3551941	602	ChrV	3550738	TgRH88_tig00000029_ChrV:19443..92542	TgME49_tig00000016_ChrV:3454143..3575867	TgCTG_tig00000015_ChrV:3359180..3411199	59	92	44
TgME49_tig00000016_ChrV_3551431_3554038	869	ChrV	3551431	TgRH88_tig00000029_ChrV:20025..94791	TgME49_tig00000016_ChrV:3452765..3575285	TgCTG_tig00000015_ChrV:3357798..3409709	51	78	35
TgME49_tig00000016_ChrV_3554621_3575867	1878	ChrV	3554621	TgRH88_tig00000029_ChrV:26578..92542	TgME49_tig00000016_ChrV:3471080..3575265	TgCTG_tig00000015_ChrV:3359180..3410597	33	52	23
TgME49_tig00000016_ChrV_3554621_3575867	938	ChrV	3554621	TgRH88_tig00000029_ChrV:20045..92542	TgME49_tig00000016_ChrV:3460630..3575265	TgCTG_tig00000015_ChrV:3359180..3410597	48	69	32
TgME49_tig00012832_ChrVI_5890_7971	1039	ChrVI	5890	ND	TgME49_tig00012832_ChrVI:5890..7967	TgCTG_tig00000010_ChrVI:6858..8940	0	2	2
TgME49_tig00012832_ChrVI_12298_16730	1712	ChrVI	12298	ND	TgME49_tig00012832_ChrVI:12298..15725	TgCTG_tig00000010_ChrVI:13271..16699	0	2	2
TgME49_tig00012832_ChrVI_18280_28427	1354	ChrVI	18280	ND	TgME49_tig00012832_ChrVI:18280..27762	TgCTG_tig00000010_ChrVI:19259..28761	0	7	7
TgME49_tig00012832_ChrVI_30277_34913	1304	ChrVI	30277	ND	TgME49_tig00012832_ChrVI:30277..34187	TgCTG_tig00000010_ChrVI:31279..35190	0	3	3
TgME49_tig00012832_ChrVI_35634_42536	1523	ChrVI	35634	ND	TgME49_tig00012832_ChrVI:35634..41729	TgCTG_tig00000010_ChrVI:36637..42731	0	4	4
TgME49_tig00012832_ChrVI_48900_67948	710	ChrVI	48900	ND	TgME49_tig00012832_ChrVI:46808..67326	TgCTG_tig00000010_ChrVI:47810..69800	0	29	31
TgME49_tig00012832_ChrVI_78120_81459	1671	ChrVI	78120	TgRH88_tig00000022_ChrVI:58535..130505	TgME49_tig00012832_ChrVI:78120..81458	TgCTG_tig00000010_ChrVI:80598..83943	2	2	2
TgME49_tig00012832_ChrVI_129217_132422	1619	ChrVI	129217	TgRH88_tig00000022_ChrVI:180118..182512	TgME49_tig00012832_ChrVI:129217..132422	TgCTG_tig00000010_ChrVI:131684..134889	2	3	3
TgME49_tig00012832_ChrVI_129217_132422	810	ChrVI	129217	TgRH88_tig00000022_ChrVI:180118..182512	TgME49_tig00012832_ChrVI:129217..132422	TgCTG_tig00000010_ChrVI:131684..134889	3	4	4
TgME49_tig00012832_ChrVI_1244680_1248679	779	ChrVI	1244680	ND	TgME49_tig00012832_ChrVI:1244680..1248572	TgCTG_tig00000010_ChrVI:1246898..1249822	0	17	12
TgME49_tig00012832_ChrVI_1244680_1248679	974	ChrVI	1244680	ND	TgME49_tig00012832_ChrVI:1244680..1248679	TgCTG_tig00000010_ChrVI:1246898..1249929	0	17	12
TgME49_tig00012832_ChrVI_3757560_3761716	555	ChrVI	3757560	TgRH88_tig00000022_ChrVI:3776213..3778432	TgME49_tig00012832_ChrVI:3758115..3761444	TgCTG_tig00000010_ChrVI:3807892..3811767	4	6	7
TgME49_tig00000010_ChrVIIa_1361000_1364737	1166	ChrVIIa	1361000	TgRH88_tig00000012_ChrVIIa:32242..38054	TgME49_tig00000010_ChrVIIa:1361005..1364498	TgCTG_tig00000011_ChrVIIa:32548..39544	5	3	6
TgME49_tig00000010_ChrVIIa_1387473_1390327	707	ChrVIIa	1387473	TgRH88_tig00000012_ChrVIIa:5497..8984	TgME49_tig00000010_ChrVIIa:1387473..1390266	TgCTG_tig00000011_ChrVIIa:6472..9280	5	4	4
TgME49_tig00000014_ChrVIIa_2172871_2177301	663	ChrVIIa	2172871	TgRH88_tig00000012_ChrVIIa:3415647..3426023	TgME49_tig00000014_ChrVIIa:2172871..2177172	TgCTG_tig00000011_ChrVIIa:3433326..3442061	15	12	18
TgME49_tig00000014_ChrVIIa_2183770_2186911	1103	ChrVIIa	2183770	TgRH88_tig00000012_ChrVIIa:3419808..3428410	TgME49_tig00000014_ChrVIIa:2177028..2185965	TgCTG_tig00000011_ChrVIIa:3439154..3446439	3	3	3
TgME49_tig00000014_ChrVIIa_2199056_2205594	965	ChrVIIa	2199056	TgRH88_tig00000012_ChrVIIa:3442493..3445328	TgME49_tig00000014_ChrVIIa:2199056..2204786	TgCTG_tig00000011_ChrVIIa:3460529..3463366	3	6	3
TgME49_tig00000014_ChrVIIa_2222220_2223819	548	ChrVIIa	2222220	TgRH88_tig00000012_ChrVIIa:3462771..3463864	TgME49_tig00000014_ChrVIIa:2222220..2223315	TgCTG_tig00000011_ChrVIIa:3481776..3482871	2	2	2
TgME49_tig00000014_ChrVIIa_2232628_2236083	994	ChrVIIa	2232628	TgRH88_tig00000012_ChrVIIa:3466938..3473564	TgME49_tig00000014_ChrVIIa:2226990..2234609	TgCTG_tig00000011_ChrVIIa:3486545..3494161	3	4	4
TgME49_tig00000014_ChrVIIa_3291227_3295437	1062	ChrVIIa	3291227	TgRH88_tig00000012_ChrVIIa:4531027..4545707	TgME49_tig00000014_ChrVIIa:3291227..3305890	TgCTG_tig00000011_ChrVIIa:4563968..4578657	9	9	9
TgME49_tig00000014_ChrVIIa_3297492_3301682	1063	ChrVIIa	3297492	TgRH88_tig00000012_ChrVIIa:4531062..4545707	TgME49_tig00000014_ChrVIIa:3291262..3305890	TgCTG_tig00000011_ChrVIIa:4564003..4578657	9	9	9
TgME49_tig00000014_ChrVIIa_3301790_3306761	1062	ChrVIIa	3301790	TgRH88_tig00000012_ChrVIIa:4531175..4545851	TgME49_tig00000014_ChrVIIa:3291375..3306034	TgCTG_tig00000011_ChrVIIa:4564116..4578801	8	8	8
TgME49_tig00000014_ChrVIIa_3311803_3337326	1850	ChrVIIa	3311803	TgRH88_tig00000012_ChrVIIa:4551622..4570132	TgME49_tig00000014_ChrVIIa:3311803..3336799	TgCTG_tig00000011_ChrVIIa:4584580..4608694	19	26	25
TgME49_tig00000014_ChrVIIa_3311803_3337326	924	ChrVIIa	3311803	TgRH88_tig00000012_ChrVIIa:4551622..4570132	TgME49_tig00000014_ChrVIIa:3311803..3336799	TgCTG_tig00000011_ChrVIIa:4584580..4608694	20	27	26
TgME49_tig00000014_ChrVIIa_3337783_3350463	1707	ChrVIIa	3337783	TgRH88_tig00000012_ChrVIIa:4571115..4583066	TgME49_tig00000014_ChrVIIa:3337783..3349729	TgCTG_tig00000011_ChrVIIa:4609678..4621637	6	6	6
TgME49_tig00000014_ChrVIIa_3350687_3355994	1699	ChrVIIa	3350687	TgRH88_tig00000012_ChrVIIa:4584027..4589130	TgME49_tig00000014_ChrVIIa:3350687..3355789	TgCTG_tig00000011_ChrVIIa:4622600..4627701	3	3	3
TgME49_tig00000014_ChrVIIa_3365006_3380272	1754	ChrVIIa	3365006	TgRH88_tig00000012_ChrVIIa:4598358..4612216	TgME49_tig00000014_ChrVIIa:3365016..3378868	TgCTG_tig00000011_ChrVIIa:4636570..4650525	4	4	4
TgME49_tig00000014_ChrVIIa_3372663_3380272	1734	ChrVIIa	3372663	TgRH88_tig00000012_ChrVIIa:4600835..4612976	TgME49_tig00000014_ChrVIIa:3367492..3379629	TgCTG_tig00000011_ChrVIIa:4642556..4651282	6	6	5
TgME49_tig00000014_ChrVIIa_3394448_3397010	998	ChrVIIa	3394448	TgRH88_tig00000012_ChrVIIa:4627797..4629792	TgME49_tig00000014_ChrVIIa:3394448..3396440	TgCTG_tig00000011_ChrVIIa:4666124..4668123	2	2	2
TgME49_tig00000014_ChrVIIa_3402851_3406356	1599	ChrVIIa	3402851	TgRH88_tig00000012_ChrVIIa:4636202..4638613	TgME49_tig00000014_ChrVIIa:3402851..3406049	TgCTG_tig00000011_ChrVIIa:4674524..4679360	2	3	5
TgME49_tig00000014_ChrVIIa_3402851_3406356	799	ChrVIIa	3402851	TgRH88_tig00000012_ChrVIIa:4636202..4638613	TgME49_tig00000014_ChrVIIa:3402851..3406049	TgCTG_tig00000011_ChrVIIa:4674524..4679360	3	4	6
TgME49_tig00000001_ChrVIII_12003_14317	672	ChrVIII	12003	TgRH88_tig00000030_ChrVIII:12233..19485	TgME49_tig00000001_ChrVIII:12003..13343	TgCTG_tig00000012_ChrVIII:12077734..12079073	3	2	2
TgME49_tig00000001_ChrVIII_16406_18456	588	ChrVIII	16406	TgRH88_tig00000030_ChrVIII:15974..24903	TgME49_tig00000001_ChrVIII:16406..18170	TgCTG_tig00000012_ChrVIII:12072901..12074667	7	3	3
TgME49_tig00000001_ChrVIII_784269_788115	618	ChrVIII	784269	TgRH88_tig00000030_ChrVIII:793215..795289	TgME49_tig00000001_ChrVIII:784269..787990	TgCTG_tig00000012_ChrVIII:11301767..11303840	8	16	8
TgME49_tig00000001_ChrVIII_1663322_1666751	883	ChrVIII	1663322	TgRH88_tig00000030_ChrVIII:1669557..1670438	TgME49_tig00000001_ChrVIII:1663322..1665970	TgCTG_tig00000012_ChrVIII:10423965..10424847	1	3	1
TgME49_tig00000001_ChrVIII_2731985_2733397	540	ChrVIII	2731985	TgRH88_tig00000030_ChrVIII:2732628..2733691	TgME49_tig00000001_ChrVIII:2732165..2733397	TgCTG_tig00000012_ChrVIII:9356722..9357954	4	5	5
TgME49_tig00000001_ChrVIII_3746269_3748937	1121	ChrVIII	3746269	TgRH88_tig00000030_ChrVIII:3750371..3751492	TgME49_tig00000001_ChrVIII:3746269..3748507	TgCTG_tig00000012_ChrVIII:8343954..8346199	1	2	2
TgME49_tig00000001_ChrVIII_3768890_3771952	1074	ChrVIII	3768890	TgRH88_tig00000030_ChrVIII:3771881..3772954	TgME49_tig00000001_ChrVIII:3768890..3771036	TgCTG_tig00000012_ChrVIII:8321403..8323550	1	2	2
TgME49_tig00000001_ChrVIII_3800909_3807233	1944	ChrVIII	3800909	TgRH88_tig00000030_ChrVIII:3802801..3806697	TgME49_tig00000001_ChrVIII:3800909..3807233	TgCTG_tig00000012_ChrVIII:8287126..8291512	5	10	6
TgME49_tig00000001_ChrVIII_3807510_3817283	1212	ChrVIII	3807510	TgRH88_tig00000030_ChrVIII:3775024..3820530	TgME49_tig00000001_ChrVIII:3773106..3817193	TgCTG_tig00000012_ChrVIII:8277155..8319332	11	9	9
TgME49_tig00000001_ChrVIII_4823741_4827187	1580	ChrVIII	4823741	TgRH88_tig00000030_ChrVIII:4818270..4821437	TgME49_tig00000001_ChrVIII:4823741..4826903	TgCTG_tig00000012_ChrVIII:7265225..7269976	3	3	5
TgME49_tig00000001_ChrVIII_4823741_4827187	791	ChrVIII	4823741	TgRH88_tig00000030_ChrVIII:4818270..4821437	TgME49_tig00000001_ChrVIII:4823741..4826903	TgCTG_tig00000012_ChrVIII:7265225..7269976	4	4	6
TgME49_tig00000001_ChrVIII_12032763_12040763	1231	ChrVIII	12032763	TgRH88_tig00000030_ChrVIII:12000154..12012870	TgME49_tig00000001_ChrVIII:12032763..12045475	TgCTG_tig00000012_ChrVIII:39809..55006	6	6	8
TgME49_tig00000001_ChrVIII_12046215_12048421	847	ChrVIII	12046215	TgRH88_tig00000030_ChrVIII:12013610..12015729	TgME49_tig00000001_ChrVIII:12046215..12048333	TgCTG_tig00000012_ChrVIII:36527..39069	4	4	5
TgME49_tig00000001_ChrVIII_12080018_12082397	659	ChrVIII	12080018	TgRH88_tig00000030_ChrVIII:12045596..12049482	TgME49_tig00000001_ChrVIII:12080018..12082303	TgCTG_tig00000012_ChrVIII:6385..9983	11	6	10
TgME49_tig00000011_ChrIX_26285_30994	1887	ChrIX	26285	TgRH88_tig00000001_ChrIX:6555198..6558962	TgME49_tig00000011_ChrIX:26300..30060	TgCTG_tig00000007_ChrIX:27204..30971	2	2	2
TgME49_tig00000011_ChrIX_31732_40695	1231	ChrIX	31732	TgRH88_tig00000001_ChrIX:6546175..6553522	TgME49_tig00000011_ChrIX:31737..40312	TgCTG_tig00000007_ChrIX:32648..40007	6	7	6
TgME49_tig00000011_ChrIX_46684_54205	1159	ChrIX	46684	TgRH88_tig00000001_ChrIX:6532826..6539784	TgME49_tig00000011_ChrIX:46700..53652	TgCTG_tig00000007_ChrIX:46395..53374	6	6	6
TgME49_tig00000011_ChrIX_4198635_4211704	687	ChrIX	4198635	TgRH88_tig00000001_ChrIX:2416531..2431466	TgME49_tig00000011_ChrIX:4198640..4210809	TgCTG_tig00000007_ChrIX:4179214..4187868	44	37	29
TgME49_tig00000011_ChrIX_4209103_4211704	1120	ChrIX	4209103	TgRH88_tig00000001_ChrIX:2421915..2424778	TgME49_tig00000011_ChrIX:4206049..4211343	TgCTG_tig00000007_ChrIX:4185260..4190422	2	3	3
TgME49_tig00000011_ChrIX_4210372_4212311	893	ChrIX	4210372	TgRH88_tig00000001_ChrIX:2421991..2424636	TgME49_tig00000011_ChrIX:4206196..4212156	TgCTG_tig00000007_ChrIX:4185406..4190360	2	4	3
TgME49_tig00000011_ChrIX_6316017_6321981	1632	ChrIX	6316017	TgRH88_tig00000001_ChrIX:323507..326690	TgME49_tig00000011_ChrIX:6317658..6320823	TgCTG_tig00000007_ChrIX:6299223..6302407	2	2	2
TgME49_tig00000011_ChrIX_6332187_6336056	1452	ChrIX	6332187	TgRH88_tig00000001_ChrIX:292442..313584	TgME49_tig00000011_ChrIX:6330115..6351029	TgCTG_tig00000007_ChrIX:6311681..6326181	5	4	6
TgME49_tig00000011_ChrIX_6335097_6338671	656	ChrIX	6335097	TgRH88_tig00000001_ChrIX:291122..314893	TgME49_tig00000011_ChrIX:6329438..6353004	TgCTG_tig00000007_ChrIX:6311026..6331428	12	14	17
TgME49_tig00000011_ChrIX_6338057_6351993	1491	ChrIX	6338057	TgRH88_tig00000001_ChrIX:295649..307570	TgME49_tig00000011_ChrIX:6338057..6348485	TgCTG_tig00000007_ChrIX:6318494..6322975	8	7	3
TgME49_tig00000011_ChrIX_6351049_6353524	655	ChrIX	6351049	TgRH88_tig00000001_ChrIX:291114..314231	TgME49_tig00000011_ChrIX:6330114..6353013	TgCTG_tig00000007_ChrIX:6311690..6331436	8	10	12
TgME49_tig00000011_ChrIX_6355034_6356720	844	ChrIX	6355034	TgRH88_tig00000001_ChrIX:287410..289094	TgME49_tig00000011_ChrIX:6355034..6356720	TgCTG_tig00000007_ChrIX:6333458..6335144	2	2	2
TgME49_tig00000011_ChrIX_6363555_6365419	544	ChrIX	6363555	TgRH88_tig00000001_ChrIX:278953..280582	TgME49_tig00000011_ChrIX:6363555..6365179	TgCTG_tig00000007_ChrIX:6341979..6343610	3	3	3
TgME49_tig00000011_ChrIX_6399170_6405325	1705	ChrIX	6399170	TgRH88_tig00000001_ChrIX:238384..245209	TgME49_tig00000011_ChrIX:6399170..6404283	TgCTG_tig00000007_ChrIX:6378106..6383228	4	3	3
TgME49_tig00000011_ChrIX_6424129_6430426	1748	ChrIX	6424129	TgRH88_tig00000001_ChrIX:213316..218559	TgME49_tig00000011_ChrIX:6424129..6429363	TgCTG_tig00000007_ChrIX:6403071..6408305	3	3	3
TgME49_tig00000011_ChrIX_6474205_6476635	692	ChrIX	6474205	TgRH88_tig00000001_ChrIX:163642..172625	TgME49_tig00000011_ChrIX:6470058..6480385	TgCTG_tig00000007_ChrIX:6448996..6457990	3	4	3
TgME49_tig00000011_ChrIX_6483400_6488894	1173	ChrIX	6483400	TgRH88_tig00000001_ChrIX:154876..156055	TgME49_tig00000011_ChrIX:6484586..6488102	TgCTG_tig00000007_ChrIX:6465599..6466779	1	3	1
TgME49_tig00000011_ChrIX_6494477_6497950	1182	ChrIX	6494477	TgRH88_tig00000001_ChrIX:126096..147913	TgME49_tig00000011_ChrIX:6494477..6518967	TgCTG_tig00000007_ChrIX:6473733..6495537	6	6	6
TgME49_tig00000011_ChrIX_6526950_6541951	1223	ChrIX	6526950	TgRH88_tig00000001_ChrIX:105241..118088	TgME49_tig00000011_ChrIX:6526962..6541629	TgCTG_tig00000007_ChrIX:6505761..6521517	21	23	26
TgME49_tig00000011_ChrIX_6526950_6541951	612	ChrIX	6526950	TgRH88_tig00000001_ChrIX:105811..118088	TgME49_tig00000011_ChrIX:6490873..6541629	TgCTG_tig00000007_ChrIX:6469554..6520946	18	25	23
TgME49_tig00000011_ChrIX_6559822_6593536	693	ChrIX	6559822	TgRH88_tig00000001_ChrIX:16962..100262	TgME49_tig00000011_ChrIX:6549398..6593009	TgCTG_tig00000007_ChrIX:6528857..6588156	115	50	75
TgME49_tig00000011_ChrIX_6594350_6595699	691	ChrIX	6594350	TgRH88_tig00000001_ChrIX:6666..8012	TgME49_tig00000011_ChrIX:6594350..6595699	TgCTG_tig00000007_ChrIX:6597146..6598495	2	2	2
TgME49_tig00012828_ChrX_3351884_3367063	1618	ChrX	3351884	TgRH88_tig00000003_ChrX:3441074..3451406	TgME49_tig00012828_ChrX:3351896..3367063	TgCTG_tig00000004_ChrX:3501217..3513991	12	18	15
TgME49_tig00012828_ChrX_3351884_3367063	810	ChrX	3351884	TgRH88_tig00000003_ChrX:3441074..3450753	TgME49_tig00012828_ChrX:3351896..3366409	TgCTG_tig00000004_ChrX:3501217..3513337	12	18	15
TgME49_tig00012828_ChrX_3418392_3428502	804	ChrX	3418392	TgRH88_tig00000003_ChrX:3502728..3511554	TgME49_tig00012828_ChrX:3418397..3428038	TgCTG_tig00000004_ChrX:3565317..3572547	11	12	9
TgME49_tig00012828_ChrX_4558750_4562131	503	ChrX	4558750	ND	TgME49_tig00012828_ChrX:4558760..4562021	TgCTG_tig00000004_ChrX:4691375..4694911	0	12	13
TgME49_tig00012828_ChrX_4558750_4562131	753	ChrX	4558750	ND	TgME49_tig00012828_ChrX:4558760..4562021	TgCTG_tig00000004_ChrX:4691375..4694911	0	11	12
TgME49_tig00012828_ChrX_6560314_6564540	1492	ChrX	6560314	TgRH88_tig00000003_ChrX:6638129..6641610	TgME49_tig00012828_ChrX:6560314..6564289	TgCTG_tig00000004_ChrX:6703274..6708744	5	6	9
TgME49_tig00012828_ChrX_7435413_7475486	1232	ChrX	7435413	TgRH88_tig00000003_ChrX:7511212..7554039	TgME49_tig00012828_ChrX:7435413..7481066	TgCTG_tig00000004_ChrX:7581342..7630864	29	33	34
TgME49_tig00012828_ChrX_7478968_7481750	1231	ChrX	7478968	TgRH88_tig00000003_ChrX:7511576..7562260	TgME49_tig00012828_ChrX:7435777..7481430	TgCTG_tig00000004_ChrX:7581699..7631228	32	35	37
TgME49_tig00012828_ChrX_7482007_7491861	862	ChrX	7482007	TgRH88_tig00000003_ChrX:7562899..7575779	TgME49_tig00012828_ChrX:7482007..7491482	TgCTG_tig00000004_ChrX:7631867..7643891	8	9	8
TgME49_tig00012828_ChrX_7507184_7510622	675	ChrX	7507184	TgRH88_tig00000003_ChrX:7591499..7595520	TgME49_tig00012828_ChrX:7507200..7510551	TgCTG_tig00000004_ChrX:7659785..7663799	6	5	6
TgME49_tig00012828_ChrX_7578143_7581564	1553	ChrX	7578143	TgRH88_tig00000003_ChrX:7654696..7666638	TgME49_tig00012828_ChrX:7574704..7586638	TgCTG_tig00000004_ChrX:7722689..7734633	4	4	4
TgME49_tig00012828_ChrX_7623077_7635850	708	ChrX	7623077	TgRH88_tig00000003_ChrX:7716276..7736783	TgME49_tig00012828_ChrX:7623077..7635827	ND	29	18	0
TgME49_tig00012828_ChrX_7640802_7645587	1924	ChrX	7640802	TgRH88_tig00000003_ChrX:7741777..7755969	TgME49_tig00012828_ChrX:7640812..7644640	ND	6	2	0
TgME49_tig00012828_ChrX_7649022_7653088	1683	ChrX	7649022	TgRH88_tig00000003_ChrX:7765478..7775574	TgME49_tig00012828_ChrX:7649022..7652386	ND	6	2	0
TgME49_tig00012830_ChrXI_1256_2994	679	ChrXI	1256	TgRH88_scf00000009_ChrXI:6644700..6749428	TgME49_tig00012830_ChrXI:1256..2613	TgCTG_tig00000020_ChrXI:6678005..6679362	58	2	2
TgME49_tig00012830_ChrXI_39657_52610	575	ChrXI	39657	TgRH88_scf00000009_ChrXI:6588912..6589487	TgME49_tig00012830_ChrXI:46501..49951	TgCTG_tig00000020_ChrXI:6631813..6635837	1	4	4
TgME49_tig00012830_ChrXI_39657_52610	862	ChrXI	39657	TgRH88_scf00000009_ChrXI:6587476..6600849	TgME49_tig00012830_ChrXI:44783..49662	TgCTG_tig00000020_ChrXI:6630946..6635837	8	4	4
TgME49_tig00012830_ChrXI_228314_230308	770	ChrXI	228314	TgRH88_scf00000009_ChrXI:6408269..6409800	TgME49_tig00012830_ChrXI:228319..229853	TgCTG_tig00000020_ChrXI:6450739..6452273	2	2	2
TgME49_tig00012830_ChrXI_235510_250971	1794	ChrXI	235510	TgRH88_scf00000009_ChrXI:6388249..6402609	TgME49_tig00012830_ChrXI:235510..249852	TgCTG_tig00000020_ChrXI:6430694..6445080	8	8	8
TgME49_tig00012830_ChrXI_260875_274677	1820	ChrXI	260875	TgRH88_scf00000009_ChrXI:6370942..6376427	TgME49_tig00012830_ChrXI:261487..274688	TgCTG_tig00000020_ChrXI:6405200..6419050	7	20	21
TgME49_tig00012830_ChrXI_260875_274688	610	ChrXI	260875	TgRH88_scf00000009_ChrXI:6370942..6376427	TgME49_tig00012830_ChrXI:261487..274191	TgCTG_tig00000020_ChrXI:6405702..6419050	9	21	22
TgME49_tig00012830_ChrXI_1362366_1364346	683	ChrXI	1362366	TgRH88_scf00000009_ChrXI:5274660..5276858	TgME49_tig00012830_ChrXI:1362366..1364346	TgCTG_tig00000020_ChrXI:5315261..5317471	8	7	8
TgME49_tig00012830_ChrXI_4247779_4249953	889	ChrXI	4247779	TgRH88_scf00000009_ChrXI:2401889..2403668	TgME49_tig00012830_ChrXI:4247779..4249557	TgCTG_tig00000020_ChrXI:2430329..2432110	2	2	2
TgME49_tig00012830_ChrXI_5636018_5644241	529	ChrXI	5636018	TgRH88_scf00000009_ChrXI:987561..1026971	TgME49_tig00012830_ChrXI:5636016..5681311	TgCTG_tig00000020_ChrXI:995636..1043831	28	32	36
TgME49_tig00012830_ChrXI_5670849_5681299	513	ChrXI	5670849	TgRH88_scf00000009_ChrXI:987758..1026778	TgME49_tig00012830_ChrXI:5636770..5681115	TgCTG_tig00000020_ChrXI:995832..1041442	26	34	31
TgME49_tig00012830_ChrXI_5672852_5681295	1521	ChrXI	5672852	TgRH88_scf00000009_ChrXI:987758..1025724	TgME49_tig00012830_ChrXI:5668845..5681115	TgCTG_tig00000020_ChrXI:995832..1036628	20	22	24
TgME49_tig00012830_ChrXI_5675357_5681302	525	ChrXI	5675357	TgRH88_scf00000009_ChrXI:987758..1026778	TgME49_tig00012830_ChrXI:5636770..5681115	TgCTG_tig00000020_ChrXI:995832..1041977	27	35	38
TgME49_tig00012830_ChrXI_5679141_5681319	542	ChrXI	5679141	TgRH88_scf00000009_ChrXI:987626..1026911	TgME49_tig00012830_ChrXI:5636085..5681247	TgCTG_tig00000020_ChrXI:995700..1043762	28	37	42
TgME49_tig00012830_ChrXI_5681686_5683227	593	ChrXI	5681686	TgRH88_scf00000009_ChrXI:986592..1028775	TgME49_tig00012830_ChrXI:5634744..5683168	TgCTG_tig00000020_ChrXI:993778..1045103	3	6	6
TgME49_tig00000006_ChrXII_7970_34510	1372	ChrXII	7970	TgRH88_tig00000025_ChrXII:444..97658	TgME49_tig00000006_ChrXII:19002..128739	TgCTG_tig00000013_ChrXII:7266077..7373269	19	14	26
TgME49_tig00000006_ChrXII_36154_73195	679	ChrXII	36154	TgRH88_tig00000025_ChrXII:26699..32804	TgME49_tig00000006_ChrXII:36154..72712	TgCTG_tig00000013_ChrXII:7329291..7332691	9	54	5
TgME49_tig00000006_ChrXII_113522_133672	1037	ChrXII	113522	TgRH88_tig00000025_ChrXII:83209..84242	TgME49_tig00000006_ChrXII:115598..116627	TgCTG_tig00000013_ChrXII:7279521..7280554	1	1	1
TgME49_tig00000006_ChrXII_113532_133641	688	ChrXII	113532	TgRH88_tig00000025_ChrXII:85988..87363	TgME49_tig00000006_ChrXII:118377..119752	TgCTG_tig00000013_ChrXII:7276401..7277775	2	2	2
TgME49_tig00000006_ChrXII_481371_513441	1287	ChrXII	481371	TgRH88_tig00000025_ChrXII:452959..519497	TgME49_tig00000006_ChrXII:481371..562361	TgCTG_tig00000013_ChrXII:6837711..6911329	43	63	49
TgME49_tig00000006_ChrXII_513471_562608	1288	ChrXII	513471	TgRH88_tig00000025_ChrXII:452976..519504	TgME49_tig00000006_ChrXII:481388..562368	TgCTG_tig00000013_ChrXII:6837704..6911312	43	63	49
TgME49_tig00000006_ChrXII_844037_846993	911	ChrXII	844037	TgRH88_tig00000025_ChrXII:793686..795735	TgME49_tig00000006_ChrXII:844037..846993	TgCTG_tig00000013_ChrXII:6574534..6576585	6	10	6
TgME49_tig00000006_ChrXII_4904405_4906003	768	ChrXII	4904405	TgRH88_tig00000025_ChrXII:4829850..4832909	TgME49_tig00000006_ChrXII:4904405..4905941	TgCTG_tig00000013_ChrXII:2531391..2532928	4	2	2
TgME49_tig00000006_ChrXII_6183951_6184985	521	ChrXII	6183951	TgRH88_tig00000025_ChrXII:6101590..6102421	TgME49_tig00000006_ChrXII:6183951..6184985	TgCTG_tig00000013_ChrXII:1239777..1240922	4	6	7
TgME49_tig00000006_ChrXII_7186038_7195832	1222	ChrXII	7186038	TgRH88_tig00000025_ChrXII:7100677..7111567	TgME49_tig00000006_ChrXII:7186038..7195773	TgCTG_tig00000013_ChrXII:230050..239845	9	8	8
TgME49_tig00000006_ChrXII_7212274_7214124	912	ChrXII	7212274	TgRH88_tig00000025_ChrXII:7127210..7129022	TgME49_tig00000006_ChrXII:7200306..7214096	TgCTG_tig00000013_ChrXII:211710..225517	2	3	3
TgME49_tig00000006_ChrXII_7226212_7229857	913	ChrXII	7226212	TgRH88_tig00000025_ChrXII:7141150..7144786	TgME49_tig00000006_ChrXII:7226212..7229845	TgCTG_tig00000013_ChrXII:195949..199585	4	4	4
TgME49_tig00000006_ChrXII_7239207_7247377	1686	ChrXII	7239207	TgRH88_tig00000025_ChrXII:7154149..7159055	TgME49_tig00000006_ChrXII:7239207..7244107	TgCTG_tig00000013_ChrXII:181680..186585	3	3	3
TgME49_tig00000006_ChrXII_7256912_7261325	1831	ChrXII	7256912	TgRH88_tig00000025_ChrXII:7172773..7175425	TgME49_tig00000006_ChrXII:7256912..7261399	TgCTG_tig00000013_ChrXII:164374..167947	2	4	3
TgME49_tig00000006_ChrXII_7256912_7261399	915	ChrXII	7256912	TgRH88_tig00000025_ChrXII:7172773..7175425	TgME49_tig00000006_ChrXII:7257831..7261399	TgCTG_tig00000013_ChrXII:164374..167947	3	4	4
TgME49_tig00000006_ChrXII_7298281_7300742	1147	ChrXII	7298281	TgRH88_tig00000025_ChrXII:7212310..7214604	TgME49_tig00000006_ChrXII:7298281..7300574	TgCTG_tig00000013_ChrXII:125192..127488	2	2	2
TgME49_tig00000006_ChrXII_7307319_7314063	1694	ChrXII	7307319	TgRH88_tig00000025_ChrXII:7221324..7224685	TgME49_tig00000006_ChrXII:7307319..7314063	TgCTG_tig00000013_ChrXII:111694..118447	2	4	4
TgME49_tig00000006_ChrXII_7317566_7322751	1731	ChrXII	7317566	TgRH88_tig00000025_ChrXII:7230218..7235401	TgME49_tig00000006_ChrXII:7317566..7322751	TgCTG_tig00000013_ChrXII:103001..108188	3	3	3
TgME49_tig00000006_ChrXII_7322877_7332181	1744	ChrXII	7322877	TgRH88_tig00000025_ChrXII:7237216..7240705	TgME49_tig00000006_ChrXII:7322877..7328107	TgCTG_tig00000013_ChrXII:97642..102875	2	3	3
TgME49_tig00000006_ChrXII_7322877_7332480	1722	ChrXII	7322877	TgRH88_tig00000025_ChrXII:7238961..7240705	ND	ND	1	0	0
TgME49_tig00000006_ChrXII_7330816_7335560	1658	ChrXII	7330816	TgRH88_tig00000025_ChrXII:7240100..7246829	TgME49_tig00000006_ChrXII:7327502..7334131	TgCTG_tig00000013_ChrXII:91551..98247	4	4	4
TgME49_tig00000006_ChrXII_7369804_7371525	678	ChrXII	7369804	TgRH88_tig00000025_ChrXII:7282015..7284047	TgME49_tig00000006_ChrXII:7369804..7371160	TgCTG_tig00000013_ChrXII:54519..55876	3	2	2
TgME49_tig00000006_ChrXII_7377597_7383002	1523	ChrXII	7377597	TgRH88_tig00000025_ChrXII:7288563..7296573	TgME49_tig00000006_ChrXII:7375677..7382166	TgCTG_tig00000013_ChrXII:43507..50002	5	4	4
TgME49_tig00000006_ChrXII_7383707_7387006	1299	ChrXII	7383707	TgRH88_tig00000025_ChrXII:7298116..7301986	TgME49_tig00000006_ChrXII:7383728..7386302	TgCTG_tig00000013_ChrXII:39370..41945	3	2	2
TgME49_tig00000006_ChrXII_7388975_7406485	1686	ChrXII	7388975	TgRH88_tig00000025_ChrXII:7304658..7326418	TgME49_tig00000006_ChrXII:7388975..7405844	TgCTG_tig00000013_ChrXII:18517..36697	12	10	10
TgME49_tig00000006_ChrXII_7414042_7419099	1685	ChrXII	7414042	TgRH88_tig00000025_ChrXII:7334624..7337999	TgME49_tig00000006_ChrXII:7414047..7419099	TgCTG_tig00000013_ChrXII:5281..10314	2	3	3

## Sheet: README
Column Header	Column Header	Description
	Period	Periodicity of tandem repeat
	Chrom	Nanopore assembly chromosome
	Chrom Position (ME49)	Nanopore assembly chromosome for ME49 genome
Nanopore Assembly Range	TgRH88	Range of tandem repeat and location for Nanopore assembly of TgRH88
	TgME49	Range of tandem repeat and location for Nanopore assembly of TgME49
	TgCTG	Range of tandem repeat and location for Nanopore assembly of TgVEG
Copy number	TgRH88	Estimated copy number of tandem repeat and location for Nanopore assembly of TgRH88
	TgME49	Estimated copy number of tandem repeat and location for Nanopore assembly of TgME49
	TgCTG	Estimated copy number of tandem repeat and location for Nanopore assembly of TgVEG
